# Supplementary material for: Manganese-mefenamic acid complexes exhibit high lipoxygenase inhibitory activity
Source: Royal Society of Chemistry journal article supplement (doi:10.1039/c4dt01111b), 2014-01-01
Supplement: c4dt01111b1.pdf [file c4dt01111b1.pdf]

## Structures of Manganese-Mefenamic Acid Complexes Determine Their High Lipoxygenase Inhibitory Activity

Jie Feng, Xin Du, Hui Liu, Xin Sui, Chen Zhang, Yun Tang, Jingyan Zhang

### Supplementary data:

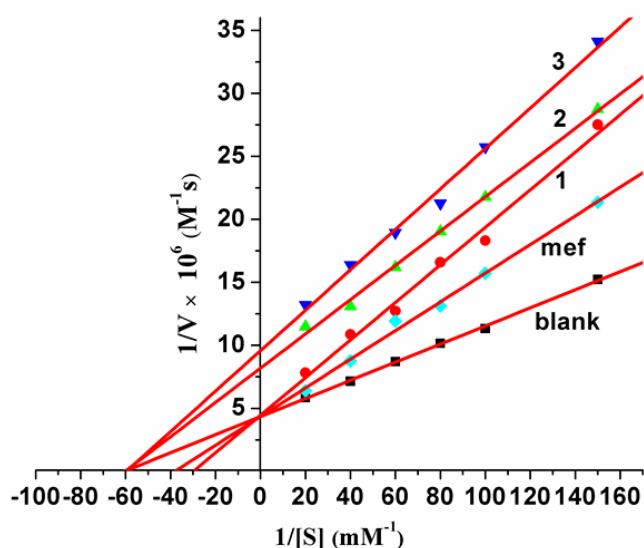

**Figure S1.** Lineweaver-Burk plots of the inhibition of LOX-1 by the complex **1-3** in  $\text{H}_3\text{BO}_3$ -NaOH buffer (0.1 M, pH 9.0). The reaction was initiated by adding  $1 \times 10^{-9}$  M of LOX-1 to the reaction mixture in the absence or presence of  $1 \times 10^{-5}$  M of the complex.

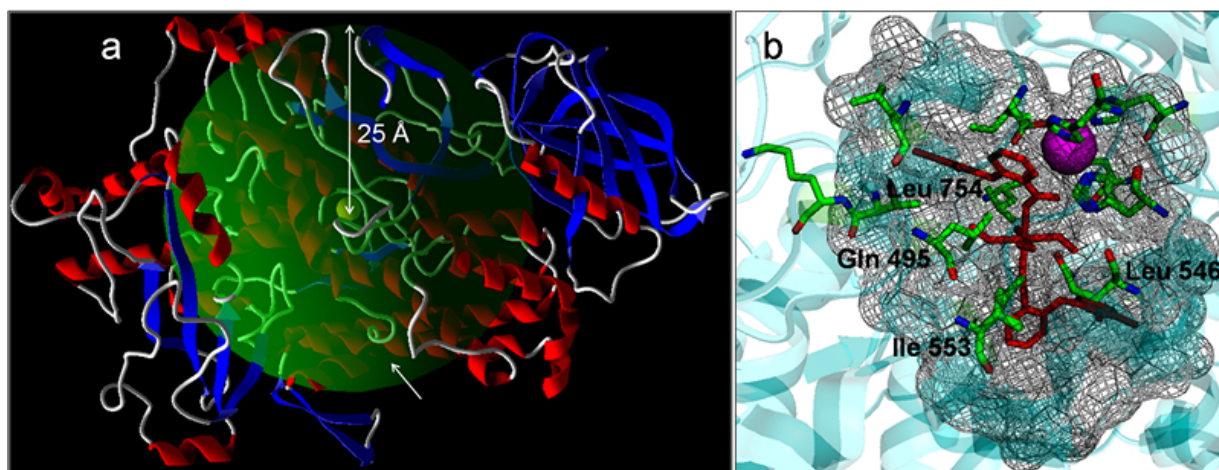

**Figure S2.** a) The docking area in this work. b) The spatial environment of the complex **1** (red molecule) inside the cavity II<sub>a</sub> (gray net area) of LOX-1. Residues Gln495, Leu546, Ile553, and Leu754 surround the four coordinated methanol molecules of the complex **1**.

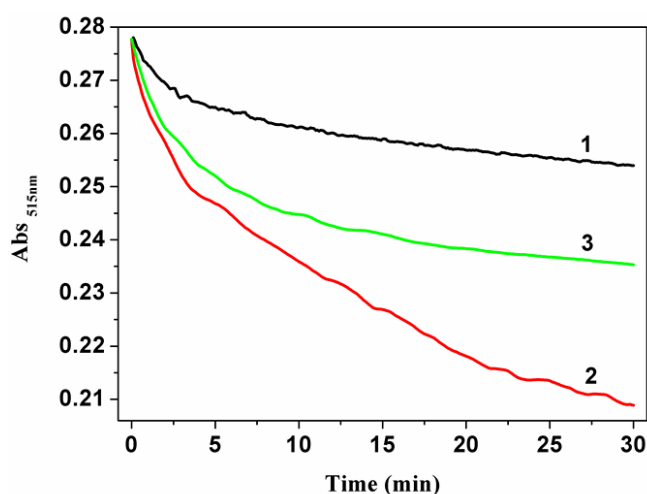

**Figure S3.** DPPH radical scavenging by the complexes **1-3** in methanol solution containing 1.5% DMF monitored at 515 nm as a function of reaction time at room temperature. [complex] = 0.1 mM, [DPPH] = 0.03 mM.

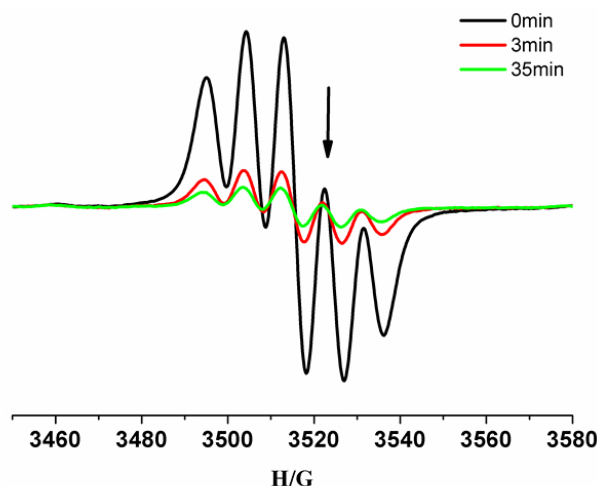

**Figure S4.** EPR signal intensity of the DPPH in the presence of complex **2** as function of incubation time. Conditions: [complex **2**] = 50  $\mu$ M in CH<sub>3</sub>OH, [DPPH] = 0.3 mM. EPR conditions: microwave frequency, 9.454 GHz; microwave power, 2 mW; modulation frequency, 100 KHz; modulation amplitude, 3 G; T = 303 K.

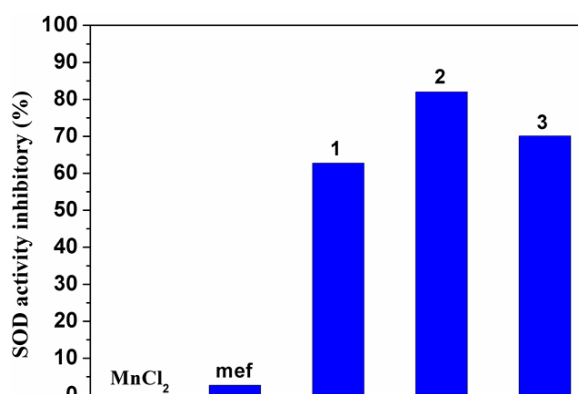

**Figure S5.** SOD inhibitory activity of the complexes **1-3**, MnCl<sub>2</sub>, and mefenamic acid. The concentration of the complexes is  $1 \times 10^{-5}$  M.

**Table S1** Selected IR data (in cm<sup>-1</sup>) for the complexes **1-3**.

| Complexes                       | <b>1</b> | <b>2</b> | <b>3</b> |
|---------------------------------|----------|----------|----------|
| $\nu(\text{O-H})$               | -        | 3469     | 3446     |
| $\nu(\text{N-H})$               | 3314     | 3306     | 3299     |
| $\nu_{\text{asym}}(\text{C=O})$ | 1613     | 1609     | 1612     |
| $\nu_{\text{sym}}(\text{C=O})$  | 1391     | 1385     | 1387     |
| $\nu(\text{C-H})$               | 748      | 745      | 841, 723 |
